# Supplementary material for: Increased methylation and decreased expression of homeobox genes TLX1, HOXA10 and DLX5 in human placenta are associated with trophoblast differentiation
Source: PubMed Central journal article supplement (PMC5495813; doi:10.1038/s41598-017-04776-5), 2017-07-03
Supplement: 41598_2017_4776_MOESM1_ESM.pdf [file 41598_2017_4776_MOESM1_ESM.pdf]

**Increased methylation and decreased expression of homeobox genes *TLX1*, *HOXA10* and *DLX5* in human placenta are associated with trophoblast differentiation.**

Boris Novakovic<sup>a</sup>, Thierry Fournier<sup>b,c,d</sup>, Lynda K Harris<sup>e</sup>, Joanna James<sup>f</sup>, Claire T Roberts<sup>g</sup>, Hannah EJ Yong<sup>h</sup>, Bill Kalionis<sup>h</sup>, Danièle Evain-Brion<sup>b,c,d</sup>, Peter R Ebeling<sup>i</sup>, Euan M Wallace<sup>j,k</sup>, Richard Saffery<sup>a,l</sup>, Padma Murthi<sup>h,i,j,\*</sup>

<sup>a</sup>Cancer and Disease Epigenetics, Murdoch Childrens Research Institute, Royal Children's Hospital, Victoria, Australia. <sup>b</sup>INSERM, UMR-S1139, Faculté des Sciences Pharmaceutiques et Biologiques, Paris, France. <sup>c</sup>Université Paris Descartes, Paris, France. <sup>d</sup>Fondation PremUp, Paris, France. <sup>e</sup>Manchester Pharmacy School, The University of Manchester, Manchester, UK.

<sup>f</sup>Department of Obstetrics and Gynaecology, University of Auckland, New Zealand. <sup>g</sup>Robinson Research Institute, and Adelaide Medical School, University of Adelaide, South Australia.

<sup>h</sup>Department of Maternal-Fetal Medicine Pregnancy Research Centre, The Royal Women's Hospital, and Department of Obstetrics and Gynaecology, University of Melbourne, Victoria, Australia.

<sup>i</sup>Department of Medicine, School of Clinical Sciences, Monash University, Victoria, Australia. <sup>j</sup>The Ritchie Centre, Hudson Institute of Medical Research, Victoria, Australia. <sup>k</sup>Department of Obstetrics and Gynaecology, Monash University, Victoria, Australia. <sup>l</sup>Department of Paediatrics, University of Melbourne, Victoria, Australia

\* Corresponding author

Dr Padma Murthi: Email: [padma.murthi@monash.edu](mailto:padma.murthi@monash.edu)

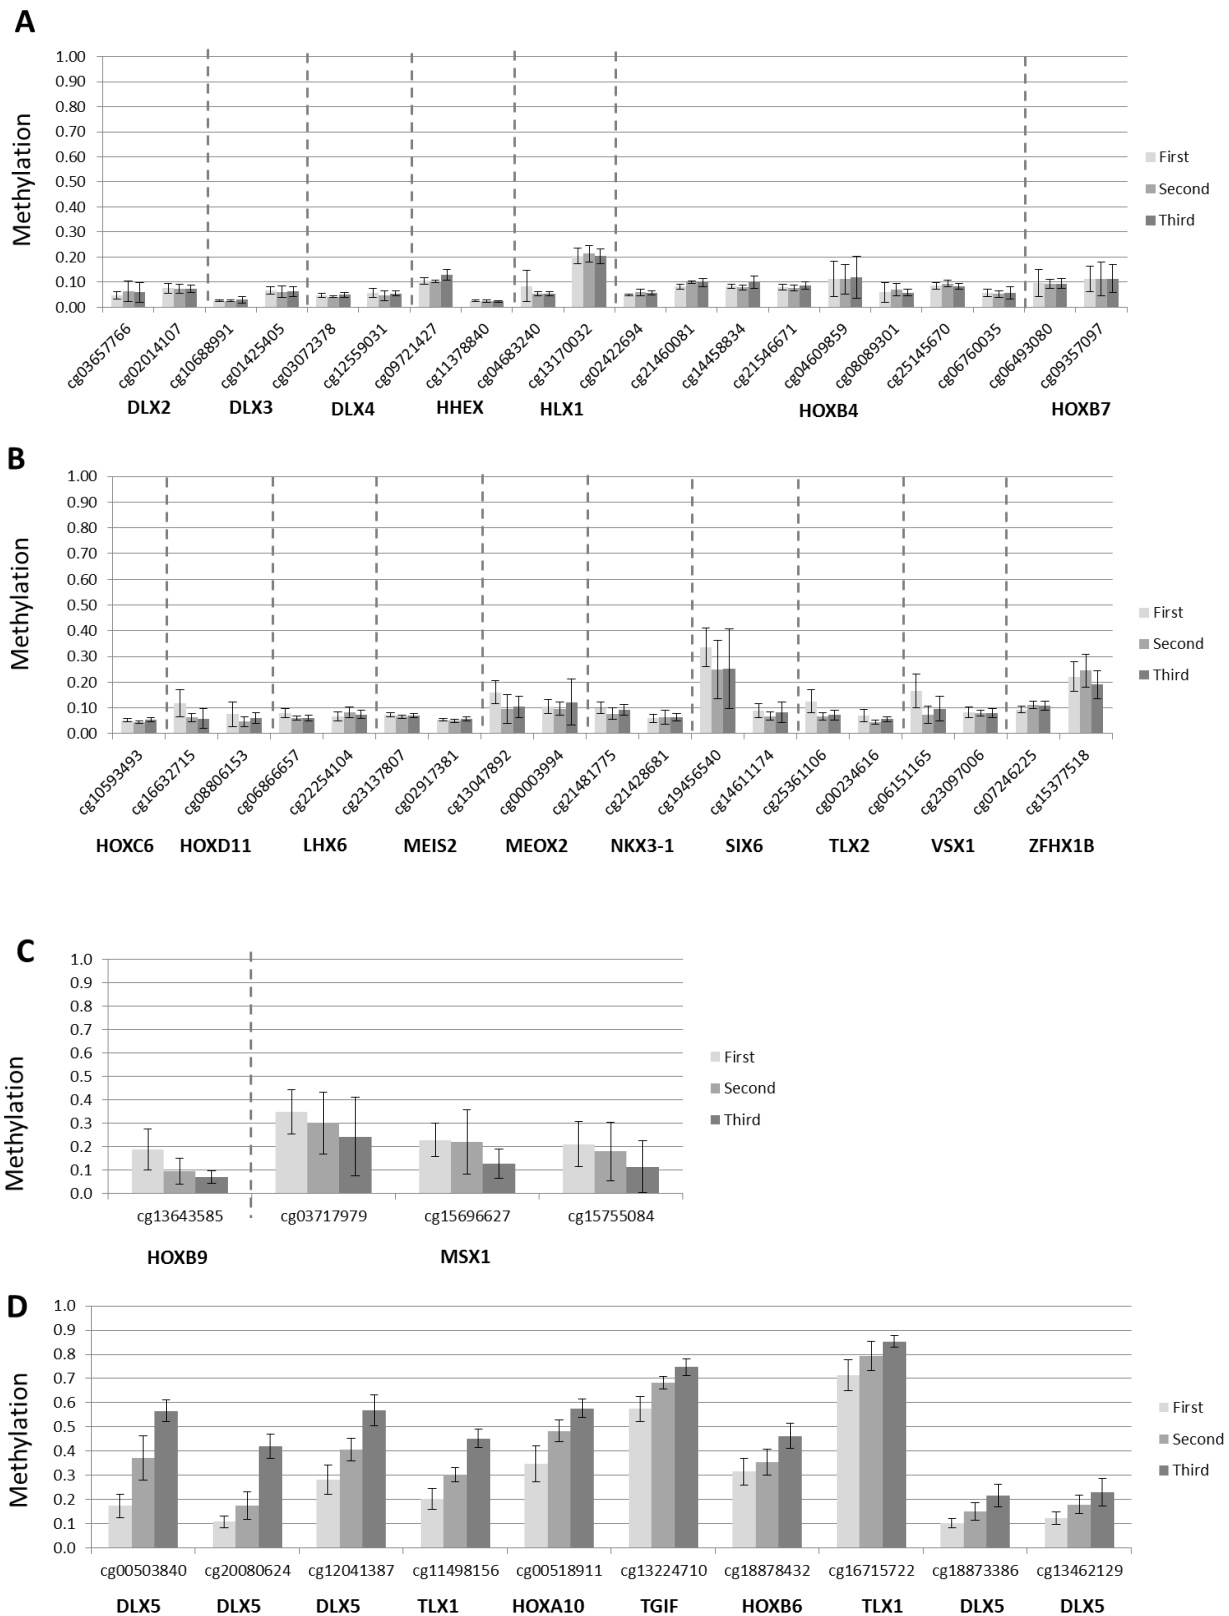

**Figure S1 Homeobox genes showing stable methylation over gestation or dynamic methylation over gestation. (A) Most HM27K array probes that were assigned to homeobox genes showed**

consistent DNA methylation over gestation. For the majority of sites, DNA methylation level was low, as expected for promoter regions. DNA methylation is shown for each site per homeobox gene, with first trimester shown in light grey, second in dark grey, and third trimester in black. (B-C) DNA methylation levels over gestation are shown for the nine genes that showed dynamic changes. Panel B shows genes with decreased methylation over gestation while panel C shows genes with increased methylation over gestation. *DLX5* had 5 CpG sites that showed increase in DNA methylation over gestation. DNA methylation is shown for each site per homeobox gene, with first trimester shown in light grey, second in dark grey, and third trimester in black.

# Chromatin profile and DNA methylation dynamics at the MSX1 locus

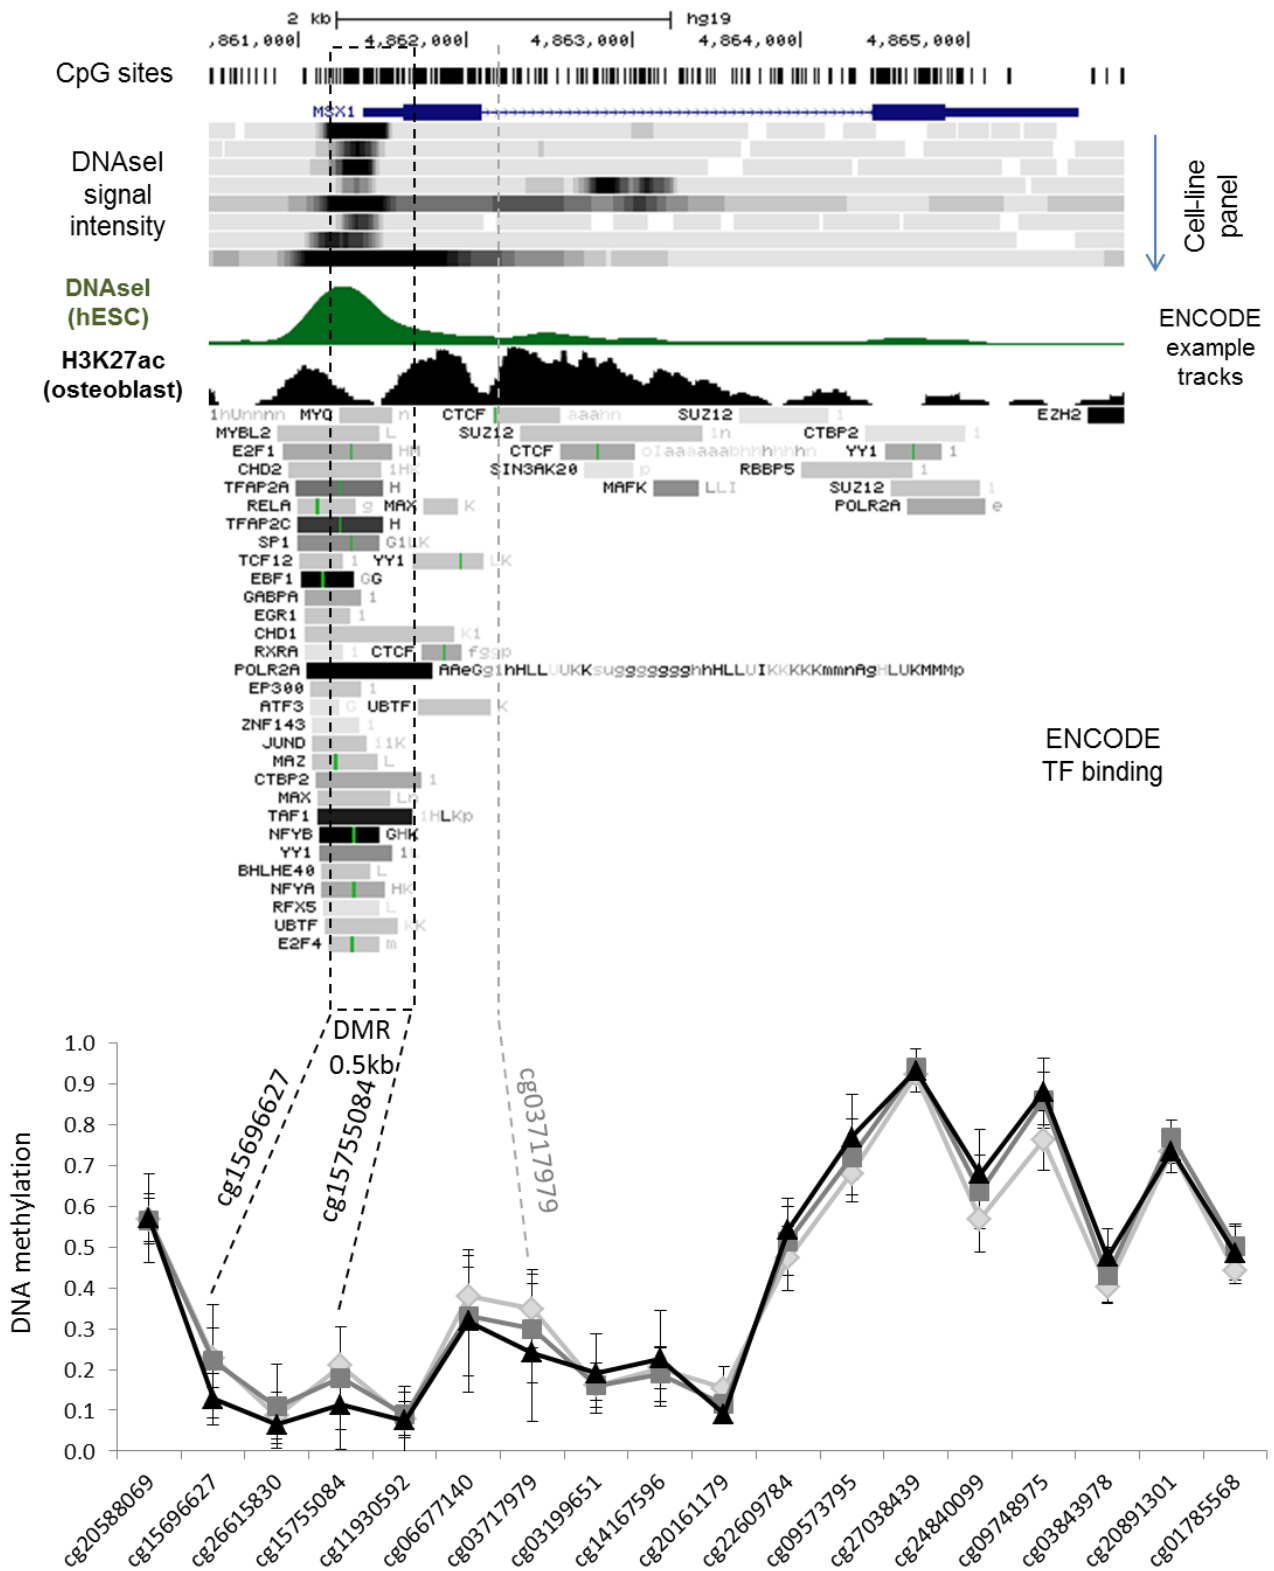

**Figure S2 MSX1 promoter region differential methylation.** MSX1 has 3 HM27 probes with dynamic DNA methylation over gestation. By plotting DNA methylation in first, second and third

trimester for each site at this gene, it is clear that DNA methylation change is occurring in the promoter region of the gene. ENCODE DNaseI track shows that the DMR is associated with open chromatin in a subset of human tissues, indicating that change in DNA methylation may result in change of accessibility.

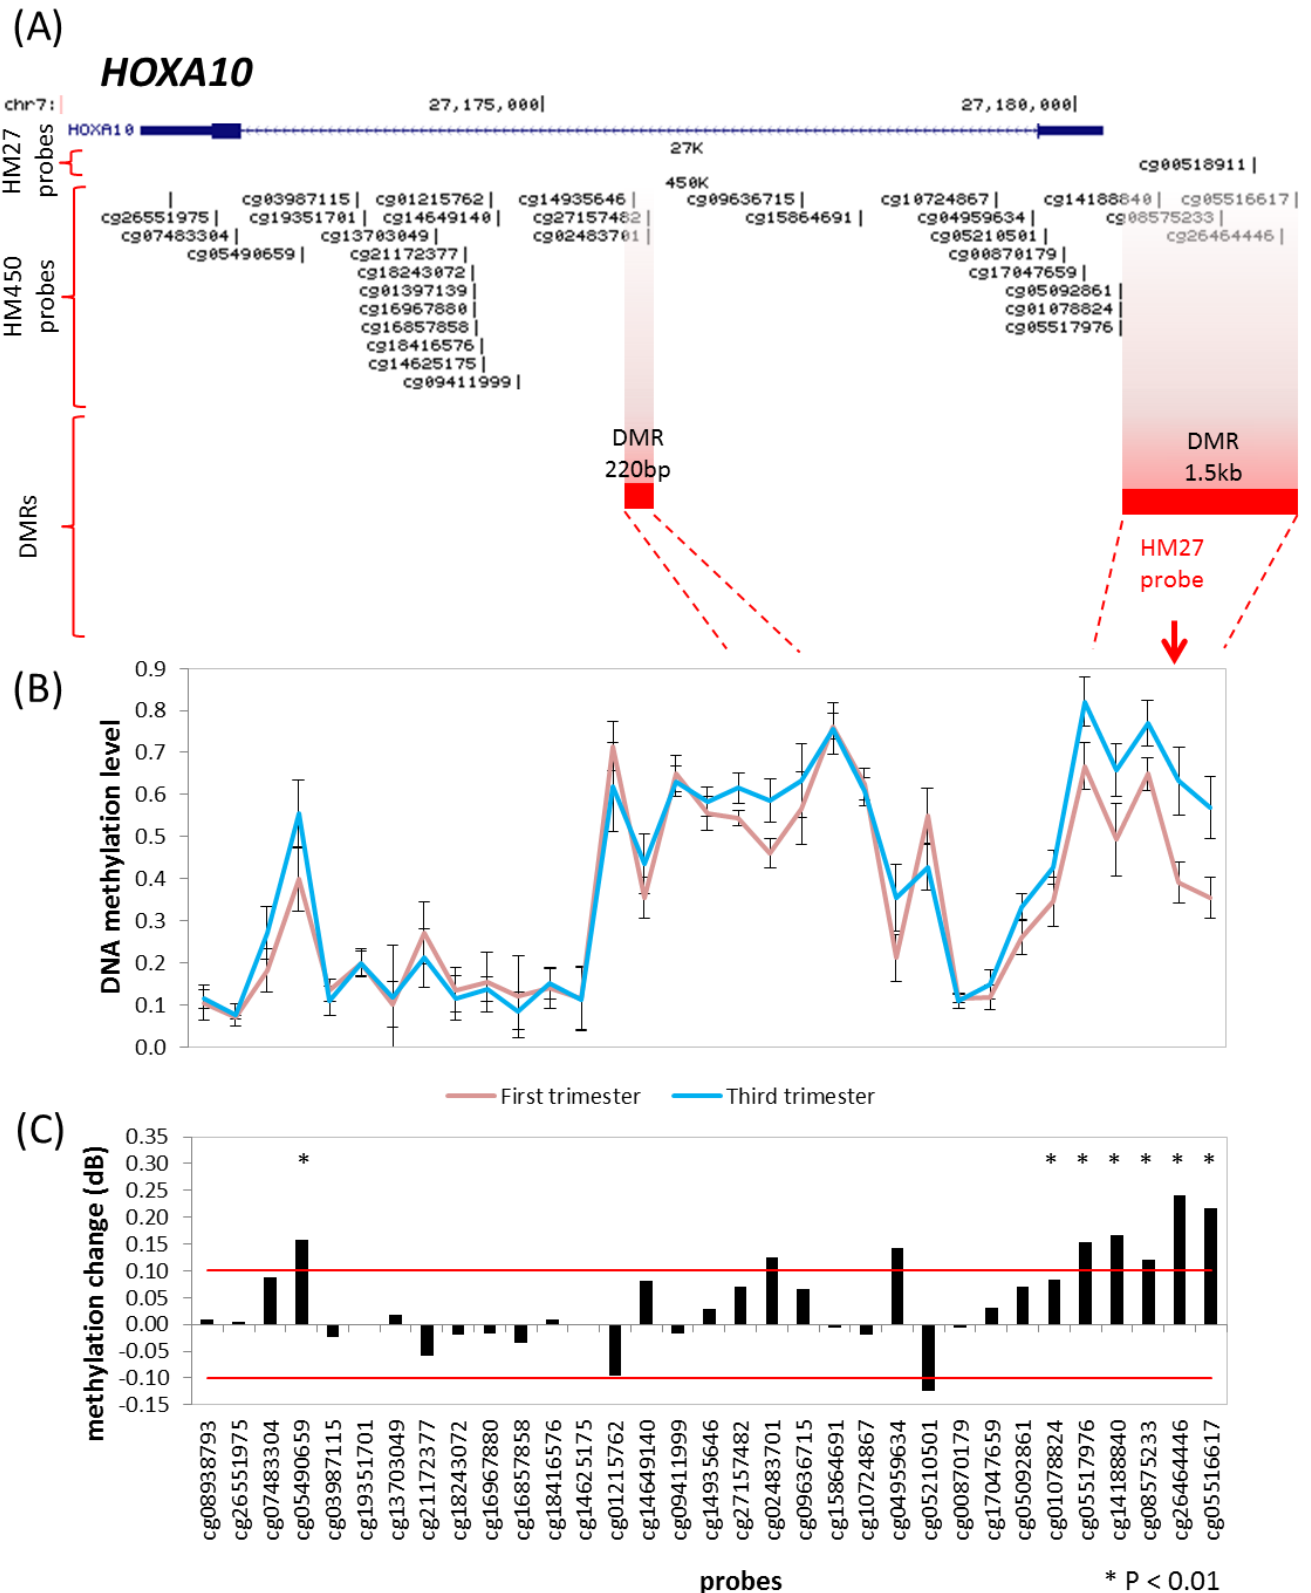

**Figure S3 DNA methylation around the HOXA10 gene.** Infinium HM450 array data was used from Blair et al. 2014. (A) location of HOXA10 gene and HM27 and HM450 probe locations. In total, 33 CpG probes cover the HOXA10 locus, which is an increase from 1 CpG probe from the HM27 array (location of which is indicated with red arrow). (B) Average methylation level for all

HM450 probes in first and third trimester placental villi. Data is shown for of n=5 first trimester and n=10 third trimester placental villi, and error bars are standard deviation. (C) Change in methylation between first and third trimester (positive value = increase over time, negative value = decrease over time). The original differential HM27 probe is surrounded by five HM450 probes that also increase in methylation over gestation, indicating that this region is a differentially methylated region (DMR).

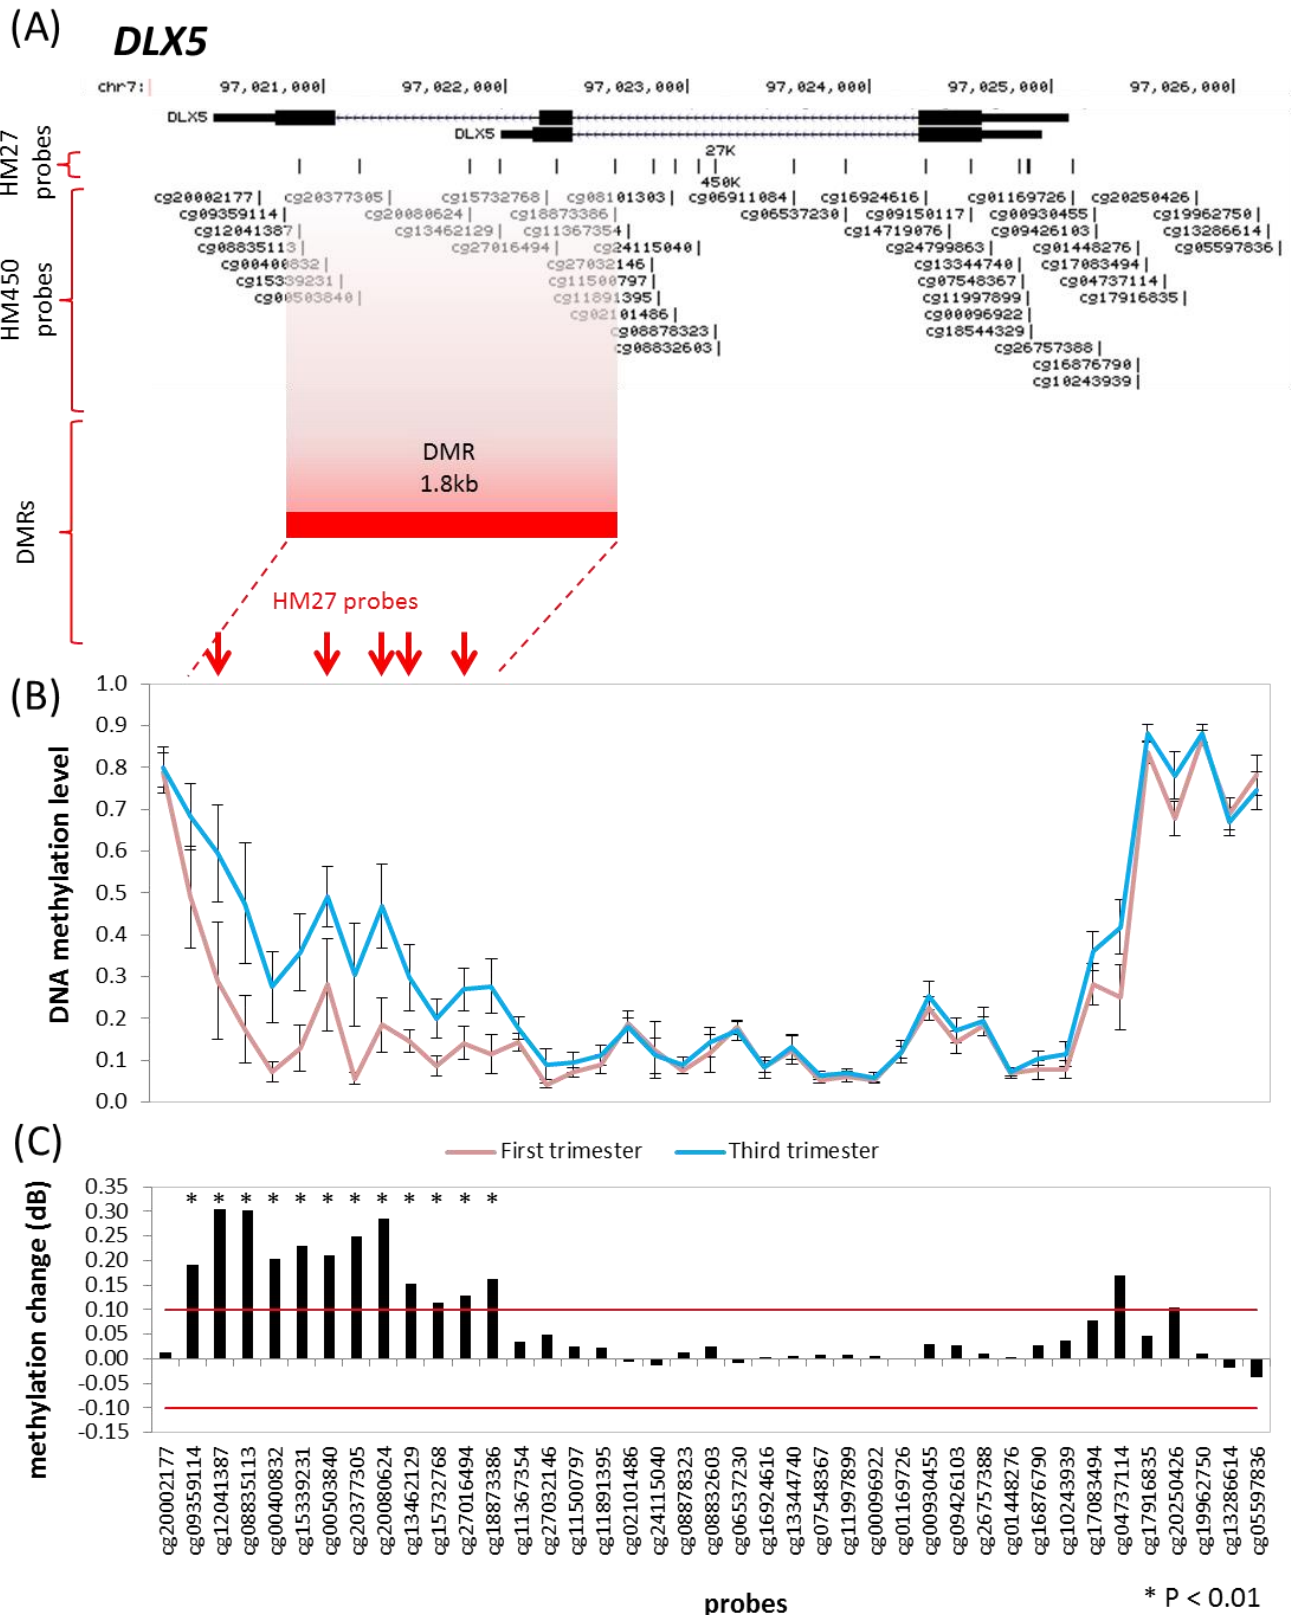

**Figure S4 DNA methylation around the DLX5 gene.** Infinium HM450 array data was used from Blair et al. 2014. (A) location of DLX5 gene and HM27 and HM450 probe locations. In total, 41 CpG probes cover the DLX5 locus, which is an increase from 18 CpG probes from the HM27 array (location of which is indicated with red arrow). (B) Average methylation level for all HM450 probes



in first and third trimester placental villi. Data is shown for of n=5 first trimester and n=10 third trimester placental villi, and error bars are standard deviation. (C) Change in methylation between first and third trimester (positive value = increase over time, negative value = decrease over time). The original five differential HM27 probes are in a region with twelve HM450 probes that also increase in methylation over gestation, indicating that this region is a differentially methylated region (DMR).

### (A) *TLX1*

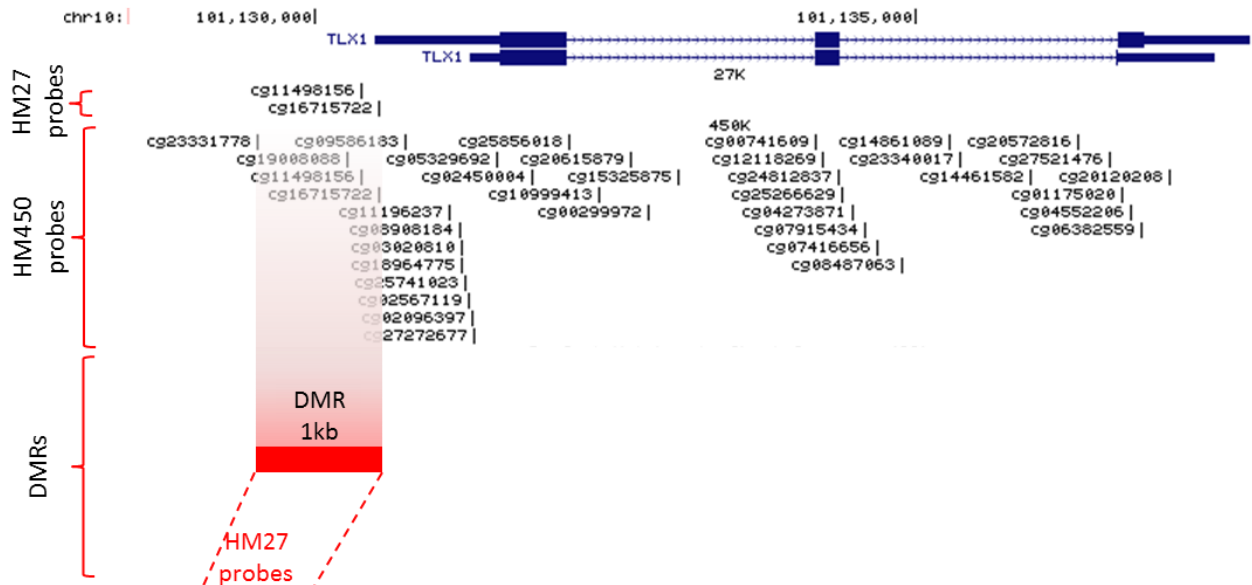

### (B)

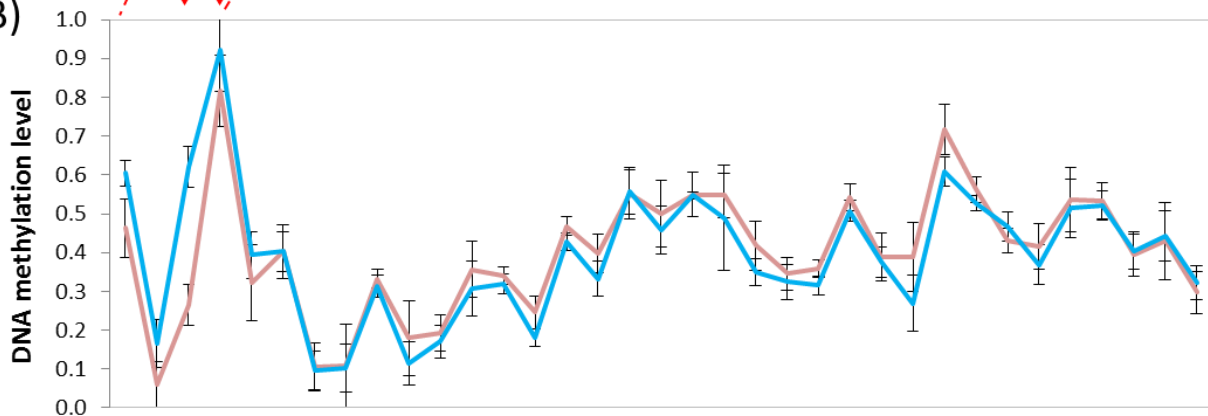

### (C)

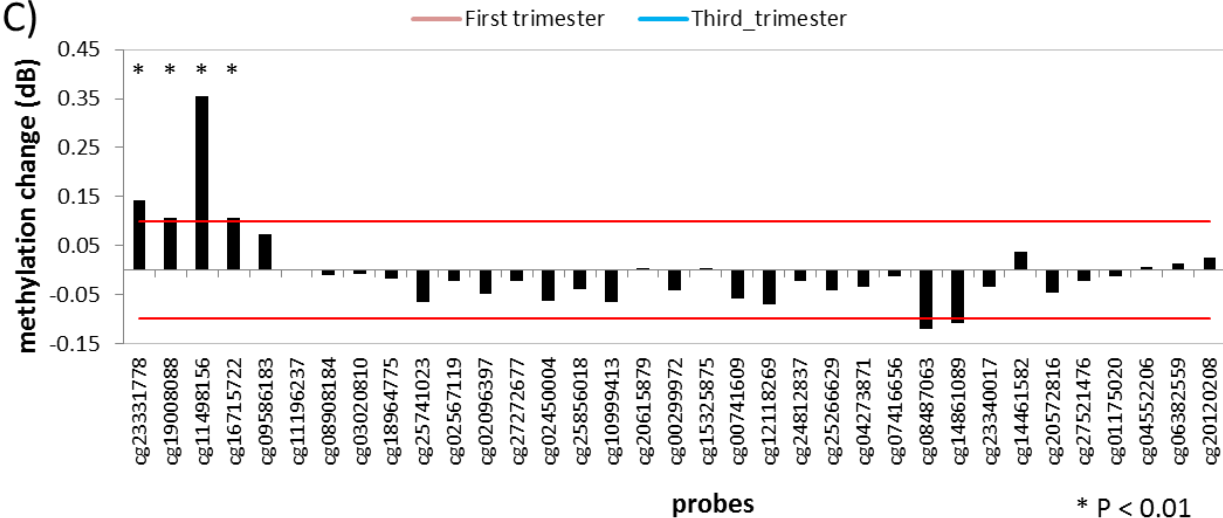

**Figure S5 DNA methylation around the *TLX1* gene.** Infinium HM450 array data was used from Blair et al. 2014. (A) location of *TLX1* gene and HM27 and HM450 probe locations. In total, 35

CpG probes cover the TLX1 locus, which is an increase from 2 CpG probes from the HM27 array (location of which is indicated with red arrow). (B) Average methylation level for all HM450 probes in first and third trimester placental villi. Data is shown for of n=5 first trimester and n=10 third trimester placental villi, and error bars are standard deviation. (C) Change in methylation between first and third trimester (positive value = increase over time, negative value = decrease over time). The original two differential HM27 probes are in a region with four HM450 probes that also increase in methylation over gestation, indicating that this region is a differentially methylated region (DMR).

**Table S1. List of HOX-associated probes, ranked by p-value based on first trimester (n=18) and third trimester (n=14) methylation.**

| Symbol | ID         | 1st trim | 1st sd | 2nd trim | 2nd sd | 3rd trim | Term sd | - logPvalue | Functional analysis? |
|--------|------------|----------|--------|----------|--------|----------|---------|-------------|----------------------|
| DLX5   | cg00503840 | 0.17     | 0.05   | 0.37     | 0.09   | 0.57     | 0.05    | 20.220      | Yes                  |
| DLX5   | cg20080624 | 0.11     | 0.02   | 0.17     | 0.06   | 0.42     | 0.05    | 20.053      | Yes                  |
| TLX1   | cg11498156 | 0.20     | 0.04   | 0.30     | 0.03   | 0.45     | 0.04    | 16.324      | yes                  |
| DLX5   | cg12041387 | 0.28     | 0.06   | 0.41     | 0.05   | 0.57     | 0.06    | 13.187      | Yes                  |
| HOXB3  | cg12910797 | 0.41     | 0.08   | 0.55     | 0.07   | 0.69     | 0.05    | 11.510      |                      |
| TGIF   | cg13224710 | 0.57     | 0.05   | 0.68     | 0.02   | 0.75     | 0.03    | 11.096      |                      |
| HOXA10 | cg00518911 | 0.35     | 0.07   | 0.48     | 0.04   | 0.58     | 0.04    | 10.793      | Yes                  |
| DLX5   | cg18873386 | 0.10     | 0.02   | 0.15     | 0.04   | 0.22     | 0.05    | 9.934       |                      |
| ALX4   | cg14144305 | 0.34     | 0.05   | 0.25     | 0.08   | 0.15     | 0.08    | 8.505       |                      |
| TLX1   | cg16715722 | 0.71     | 0.06   | 0.79     | 0.06   | 0.85     | 0.02    | 8.085       |                      |
| HOXB6  | cg18878432 | 0.32     | 0.06   | 0.35     | 0.05   | 0.46     | 0.05    | 7.960       |                      |
| HOXB1  | cg07823492 | 0.57     | 0.10   | 0.73     | 0.07   | 0.80     | 0.06    | 7.503       |                      |
| DLX5   | cg27016494 | 0.10     | 0.02   | 0.16     | 0.06   | 0.19     | 0.05    | 7.268       |                      |
| DLX5   | cg13462129 | 0.12     | 0.03   | 0.18     | 0.04   | 0.23     | 0.06    | 7.182       |                      |
| ALX4   | cg04970352 | 0.48     | 0.06   | 0.38     | 0.11   | 0.26     | 0.12    | 6.983       |                      |
| ALX4   | cg00418150 | 0.60     | 0.04   | 0.55     | 0.05   | 0.70     | 0.04    | 6.796       |                      |
| HOXA11 | cg17950095 | 0.35     | 0.06   | 0.26     | 0.09   | 0.15     | 0.13    | 5.950       |                      |
| HOXA9  | cg01354473 | 0.36     | 0.08   | 0.47     | 0.07   | 0.53     | 0.08    | 5.746       |                      |
| ALX4   | cg00415164 | 0.15     | 0.04   | 0.12     | 0.08   | 0.08     | 0.01    | 5.425       |                      |
| HOXA9  | cg01381846 | 0.38     | 0.09   | 0.47     | 0.11   | 0.52     | 0.07    | 4.937       |                      |
| ALX4   | cg04549333 | 0.25     | 0.07   | 0.19     | 0.07   | 0.12     | 0.06    | 4.884       |                      |
| HOXB2  | cg25882366 | 0.34     | 0.09   | 0.36     | 0.09   | 0.49     | 0.08    | 4.879       |                      |
| HOXB9  | cg13643585 | 0.19     | 0.09   | 0.09     | 0.05   | 0.07     | 0.03    | 4.568       |                      |
| HOXC4  | cg21487207 | 0.45     | 0.06   | 0.30     | 0.05   | 0.29     | 0.13    | 4.360       |                      |
| ALX4   | cg13807496 | 0.14     | 0.03   | 0.08     | 0.03   | 0.09     | 0.03    | 4.244       |                      |
| ALX4   | cg15522957 | 0.49     | 0.07   | 0.52     | 0.05   | 0.63     | 0.09    | 4.244       |                      |
| HOXA9  | cg27009703 | 0.50     | 0.07   | 0.58     | 0.03   | 0.61     | 0.07    | 4.089       |                      |
| ALX4   | cg19358442 | 0.29     | 0.08   | 0.27     | 0.08   | 0.17     | 0.08    | 3.879       |                      |
| HOXB4  | cg02422694 | 0.05     | 0.00   | 0.06     | 0.01   | 0.06     | 0.01    | 3.870       |                      |
| MSX1   | cg09748975 | 0.76     | 0.07   | 0.86     | 0.07   | 0.88     | 0.08    | 3.814       |                      |
| MSX1   | cg20161179 | 0.15     | 0.05   | 0.12     | 0.03   | 0.09     | 0.02    | 3.786       |                      |
| TLX2   | cg25361106 | 0.13     | 0.04   | 0.07     | 0.01   | 0.07     | 0.02    | 3.721       |                      |
| MSX1   | cg15696627 | 0.23     | 0.07   | 0.22     | 0.14   | 0.13     | 0.06    | 3.584       |                      |
| ALX4   | cg08914623 | 0.13     | 0.07   | 0.07     | 0.03   | 0.04     | 0.03    | 3.461       |                      |
| ALX4   | cg08993172 | 0.16     | 0.04   | 0.13     | 0.02   | 0.11     | 0.04    | 3.302       |                      |
| HHEX   | cg09721427 | 0.11     | 0.01   | 0.10     | 0.01   | 0.13     | 0.02    | 3.236       |                      |
| MSX1   | cg03843978 | 0.40     | 0.04   | 0.43     | 0.07   | 0.48     | 0.07    | 3.222       |                      |
| TGIF   | cg20322862 | 0.17     | 0.03   | 0.13     | 0.03   | 0.13     | 0.03    | 3.045       |                      |
| HOXB4  | cg21460081 | 0.08     | 0.01   | 0.10     | 0.01   | 0.10     | 0.02    | 3.006       |                      |
| MEOX2  | cg13047892 | 0.16     | 0.04   | 0.10     | 0.06   | 0.10     | 0.04    | 2.962       |                      |
| HOXD11 | cg16632715 | 0.12     | 0.05   | 0.06     | 0.02   | 0.06     | 0.04    | 2.910       |                      |
| LHX6   | cg06866657 | 0.08     | 0.02   | 0.06     | 0.01   | 0.06     | 0.01    | 2.749       |                      |
| DLX5   | cg09150117 | 0.08     | 0.02   | 0.11     | 0.04   | 0.10     | 0.02    | 2.617       |                      |
| MSX1   | cg24840099 | 0.57     | 0.08   | 0.64     | 0.09   | 0.68     | 0.11    | 2.609       |                      |
| VSX1   | cg06151165 | 0.16     | 0.07   | 0.07     | 0.03   | 0.10     | 0.05    | 2.563       |                      |
| HOXA13 | cg10883303 | 0.07     | 0.04   | 0.05     | 0.03   | 0.04     | 0.01    | 2.276       |                      |
| HOXC12 | cg05589246 | 0.14     | 0.05   | 0.11     | 0.02   | 0.10     | 0.03    | 2.256       |                      |
| HOXB5  | cg01405107 | 0.10     | 0.01   | 0.09     | 0.01   | 0.11     | 0.02    | 2.250       |                      |
| ZFXH1B | cg07246225 | 0.09     | 0.01   | 0.11     | 0.01   | 0.11     | 0.02    | 2.201       |                      |
| MSX1   | cg09573795 | 0.68     | 0.07   | 0.72     | 0.09   | 0.77     | 0.10    | 2.138       |                      |
| HOXB8  | cg25928579 | 0.16     | 0.03   | 0.16     | 0.04   | 0.13     | 0.04    | 2.128       |                      |
| HOXC11 | cg07123069 | 0.22     | 0.06   | 0.12     | 0.07   | 0.15     | 0.09    | 2.114       |                      |
| DLX5   | cg08878323 | 0.10     | 0.02   | 0.11     | 0.03   | 0.12     | 0.02    | 1.965       |                      |
| MSX1   | cg15755084 | 0.21     | 0.10   | 0.18     | 0.13   | 0.11     | 0.11    | 1.885       |                      |
| HOXB6  | cg16848873 | 0.16     | 0.03   | 0.15     | 0.03   | 0.13     | 0.03    | 1.879       |                      |
| MSX1   | cg22609784 | 0.47     | 0.08   | 0.51     | 0.08   | 0.54     | 0.08    | 1.835       |                      |
| HOXD3  | cg18702197 | 0.22     | 0.05   | 0.16     | 0.09   | 0.16     | 0.07    | 1.795       |                      |
| ALX4   | cg26365854 | 0.07     | 0.03   | 0.05     | 0.01   | 0.05     | 0.01    | 1.779       |                      |
| HOXA7  | cg26511321 | 0.71     | 0.05   | 0.64     | 0.06   | 0.75     | 0.04    | 1.778       |                      |
| ALX4   | cg11260848 | 0.35     | 0.06   | 0.30     | 0.06   | 0.27     | 0.13    | 1.734       |                      |
| HOXA11 | cg12686016 | 0.14     | 0.07   | 0.10     | 0.02   | 0.09     | 0.02    | 1.702       |                      |
| HOXC11 | cg22709192 | 0.32     | 0.07   | 0.23     | 0.07   | 0.25     | 0.09    | 1.677       |                      |
| HOXB2  | cg09313705 | 0.74     | 0.04   | 0.70     | 0.05   | 0.78     | 0.06    | 1.674       |                      |
| MSX1   | cg01785568 | 0.44     | 0.03   | 0.50     | 0.05   | 0.48     | 0.07    | 1.664       |                      |
| HOXD9  | cg10957151 | 0.22     | 0.10   | 0.15     | 0.05   | 0.15     | 0.06    | 1.607       |                      |
| HOXD12 | cg03874199 | 0.34     | 0.07   | 0.27     | 0.09   | 0.27     | 0.12    | 1.594       |                      |
| HOXC12 | cg19928450 | 0.17     | 0.04   | 0.14     | 0.04   | 0.13     | 0.05    | 1.589       |                      |
| HOXA11 | cg15760840 | 0.16     | 0.04   | 0.10     | 0.04   | 0.12     | 0.05    | 1.572       |                      |
| HOXB4  | cg14458834 | 0.08     | 0.01   | 0.08     | 0.01   | 0.10     | 0.03    | 1.523       |                      |
| HOXC5  | cg15700739 | 0.23     | 0.02   | 0.19     | 0.03   | 0.25     | 0.05    | 1.521       |                      |
| DLX5   | cg11500797 | 0.08     | 0.02   | 0.09     | 0.01   | 0.10     | 0.02    | 1.520       |                      |
| MSX1   | cg03717979 | 0.35     | 0.10   | 0.30     | 0.13   | 0.24     | 0.17    | 1.505       |                      |
| HOXD10 | cg03918304 | 0.30     | 0.04   | 0.39     | 0.07   | 0.38     | 0.15    | 1.494       |                      |
| TLX2   | cg00234616 | 0.07     | 0.02   | 0.04     | 0.01   | 0.06     | 0.01    | 1.386       |                      |
| HOXC8  | cg25917510 | 0.05     | 0.01   | 0.03     | 0.00   | 0.04     | 0.00    | 1.343       |                      |
| ALX4   | cg15817236 | 0.10     | 0.03   | 0.07     | 0.02   | 0.07     | 0.03    | 1.336       |                      |
| SIX6   | cg19456540 | 0.34     | 0.08   | 0.25     | 0.11   | 0.25     | 0.16    | 1.282       |                      |
| DLX5   | cg16924616 | 0.05     | 0.01   | 0.06     | 0.01   | 0.05     | 0.01    | 1.271       |                      |
| HHEX   | cg11378840 | 0.03     | 0.00   | 0.02     | 0.00   | 0.02     | 0.00    | 1.250       |                      |

| Symbol | ID         | 1st trim | 1st sd | 2nd trim | 2nd sd | 3rd trim | Term sd | - logPvalue | Functional analysis? |
|--------|------------|----------|--------|----------|--------|----------|---------|-------------|----------------------|
| HOXA2  | cg09871315 | 0.32     | 0.07   | 0.22     | 0.07   | 0.26     | 0.10    | 1.247       |                      |
| HOXC5  | cg16983211 | 0.12     | 0.01   | 0.13     | 0.01   | 0.13     | 0.01    | 1.236       |                      |
| DLX5   | cg00096922 | 0.06     | 0.01   | 0.06     | 0.01   | 0.06     | 0.01    | 1.223       |                      |
| HOXC10 | cg26153631 | 0.20     | 0.04   | 0.18     | 0.03   | 0.23     | 0.05    | 1.210       |                      |
| HOXA9  | cg26521404 | 0.54     | 0.10   | 0.59     | 0.06   | 0.60     | 0.09    | 1.198       |                      |
| HOXA5  | cg12128839 | 0.05     | 0.01   | 0.06     | 0.01   | 0.06     | 0.01    | 1.154       |                      |
| ALX4   | cg14753432 | 0.48     | 0.03   | 0.48     | 0.05   | 0.50     | 0.04    | 1.143       |                      |
| ALX4   | cg27318318 | 0.09     | 0.02   | 0.06     | 0.01   | 0.08     | 0.02    | 1.115       |                      |
| ALX4   | cg00061629 | 0.35     | 0.08   | 0.49     | 0.09   | 0.42     | 0.13    | 1.071       |                      |
| HLX1   | cg04683240 | 0.08     | 0.06   | 0.05     | 0.01   | 0.05     | 0.01    | 1.039       |                      |
| HOXB4  | cg21546671 | 0.08     | 0.01   | 0.08     | 0.01   | 0.09     | 0.02    | 0.986       |                      |
| HOXB5  | cg16495265 | 0.23     | 0.06   | 0.18     | 0.06   | 0.18     | 0.11    | 0.946       |                      |
| HOXC4  | cg10918927 | 0.04     | 0.01   | 0.03     | 0.00   | 0.03     | 0.01    | 0.940       |                      |
| ALX4   | cg23058901 | 0.47     | 0.04   | 0.47     | 0.04   | 0.51     | 0.08    | 0.929       |                      |
| HOXC9  | cg21272774 | 0.08     | 0.03   | 0.10     | 0.02   | 0.10     | 0.02    | 0.927       |                      |
| ZFH1B  | cg15377518 | 0.22     | 0.06   | 0.25     | 0.06   | 0.19     | 0.05    | 0.888       |                      |
| HOXA4  | cg24169822 | 0.56     | 0.06   | 0.54     | 0.10   | 0.60     | 0.09    | 0.874       |                      |
| HOXB8  | cg15539420 | 0.33     | 0.08   | 0.30     | 0.11   | 0.26     | 0.17    | 0.867       |                      |
| HOXD10 | cg21591742 | 0.26     | 0.06   | 0.20     | 0.08   | 0.22     | 0.09    | 0.847       |                      |
| DLX5   | cg13344740 | 0.18     | 0.01   | 0.15     | 0.02   | 0.19     | 0.02    | 0.833       |                      |
| ALX4   | cg18546622 | 0.27     | 0.07   | 0.31     | 0.06   | 0.31     | 0.10    | 0.833       |                      |
| HOXA9  | cg25047280 | 0.33     | 0.07   | 0.32     | 0.10   | 0.40     | 0.17    | 0.828       |                      |
| MEIS2  | cg23137807 | 0.07     | 0.01   | 0.07     | 0.01   | 0.07     | 0.01    | 0.827       |                      |
| HOXA5  | cg02248486 | 0.10     | 0.03   | 0.11     | 0.03   | 0.12     | 0.05    | 0.803       |                      |
| HOXD9  | cg14991487 | 0.10     | 0.07   | 0.06     | 0.03   | 0.06     | 0.03    | 0.791       |                      |
| MSX1   | cg06677140 | 0.38     | 0.07   | 0.33     | 0.15   | 0.32     | 0.17    | 0.739       |                      |
| HOXD4  | cg00767581 | 0.33     | 0.07   | 0.34     | 0.08   | 0.29     | 0.08    | 0.729       |                      |
| HOXC13 | cg20587394 | 0.04     | 0.01   | 0.04     | 0.01   | 0.04     | 0.01    | 0.708       |                      |
| HOXD4  | cg12127282 | 0.41     | 0.07   | 0.45     | 0.11   | 0.45     | 0.13    | 0.664       |                      |
| DLX2   | cg03657766 | 0.05     | 0.02   | 0.06     | 0.04   | 0.06     | 0.04    | 0.642       |                      |
| ALX4   | cg04988423 | 0.04     | 0.01   | 0.03     | 0.01   | 0.03     | 0.01    | 0.637       |                      |
| MSX1   | cg26615830 | 0.09     | 0.06   | 0.11     | 0.10   | 0.06     | 0.05    | 0.629       |                      |
| HOXD11 | cg08806153 | 0.08     | 0.05   | 0.05     | 0.02   | 0.06     | 0.02    | 0.617       |                      |
| LHX6   | cg22254104 | 0.07     | 0.02   | 0.08     | 0.02   | 0.07     | 0.02    | 0.616       |                      |
| MSX1   | cg03199651 | 0.16     | 0.04   | 0.16     | 0.05   | 0.19     | 0.10    | 0.607       |                      |
| DLX5   | cg02101486 | 0.15     | 0.03   | 0.18     | 0.03   | 0.17     | 0.04    | 0.602       |                      |
| MEIS2  | cg02917381 | 0.05     | 0.00   | 0.05     | 0.01   | 0.06     | 0.01    | 0.573       |                      |
| HOXB13 | cg15786837 | 0.13     | 0.04   | 0.11     | 0.04   | 0.11     | 0.06    | 0.549       |                      |
| NKX3-1 | cg21481775 | 0.10     | 0.02   | 0.08     | 0.02   | 0.09     | 0.02    | 0.521       |                      |
| HOXC10 | cg08900043 | 0.03     | 0.01   | 0.03     | 0.01   | 0.03     | 0.01    | 0.476       |                      |
| HOXB9  | cg12370791 | 0.03     | 0.01   | 0.03     | 0.00   | 0.03     | 0.01    | 0.476       |                      |
| ALX4   | cg16977035 | 0.45     | 0.06   | 0.43     | 0.07   | 0.47     | 0.06    | 0.448       |                      |
| HOXD4  | cg14399060 | 0.12     | 0.04   | 0.11     | 0.02   | 0.11     | 0.04    | 0.445       |                      |
| DLX3   | cg10688991 | 0.03     | 0.00   | 0.03     | 0.00   | 0.03     | 0.01    | 0.437       |                      |
| DLX3   | cg01425405 | 0.07     | 0.01   | 0.06     | 0.02   | 0.06     | 0.02    | 0.436       |                      |
| ALX4   | cg25363445 | 0.27     | 0.05   | 0.25     | 0.04   | 0.25     | 0.06    | 0.433       |                      |
| HOXA1  | cg03700462 | 0.05     | 0.01   | 0.05     | 0.01   | 0.06     | 0.04    | 0.430       |                      |
| HOXD4  | cg01152019 | 0.12     | 0.04   | 0.11     | 0.04   | 0.11     | 0.02    | 0.381       |                      |
| MSX1   | cg14167596 | 0.20     | 0.05   | 0.19     | 0.07   | 0.23     | 0.12    | 0.356       |                      |
| DLX5   | cg01169726 | 0.08     | 0.02   | 0.05     | 0.01   | 0.07     | 0.02    | 0.354       |                      |
| MEOX2  | cg00003994 | 0.11     | 0.03   | 0.10     | 0.03   | 0.12     | 0.09    | 0.352       |                      |
| NKX3-1 | cg21428681 | 0.06     | 0.02   | 0.06     | 0.03   | 0.06     | 0.01    | 0.324       |                      |
| HOXA6  | cg04265576 | 0.33     | 0.07   | 0.26     | 0.10   | 0.37     | 0.18    | 0.323       |                      |
| ALX4   | cg11797994 | 0.34     | 0.03   | 0.31     | 0.02   | 0.33     | 0.03    | 0.315       |                      |
| MSX1   | cg27038439 | 0.92     | 0.02   | 0.94     | 0.01   | 0.93     | 0.05    | 0.291       |                      |
| DLX5   | cg24115040 | 0.08     | 0.02   | 0.09     | 0.01   | 0.09     | 0.01    | 0.273       |                      |
| DLX5   | cg06537230 | 0.11     | 0.03   | 0.12     | 0.06   | 0.12     | 0.03    | 0.262       |                      |
| HOXC9  | cg26829131 | 0.06     | 0.02   | 0.06     | 0.02   | 0.06     | 0.02    | 0.257       |                      |
| DLX5   | cg06911084 | 0.09     | 0.05   | 0.11     | 0.05   | 0.11     | 0.07    | 0.256       |                      |
| HOXB13 | cg21842478 | 0.05     | 0.01   | 0.05     | 0.00   | 0.05     | 0.01    | 0.252       |                      |
| HOXA7  | cg23432345 | 0.08     | 0.03   | 0.07     | 0.02   | 0.09     | 0.06    | 0.233       |                      |
| DLX4   | cg03072378 | 0.05     | 0.01   | 0.04     | 0.00   | 0.05     | 0.01    | 0.232       |                      |
| HOXB1  | cg17233506 | 0.60     | 0.05   | 0.59     | 0.04   | 0.61     | 0.05    | 0.228       |                      |
| SIX6   | cg14611174 | 0.09     | 0.03   | 0.07     | 0.01   | 0.08     | 0.04    | 0.226       |                      |
| DLX4   | cg12559031 | 0.06     | 0.02   | 0.05     | 0.02   | 0.06     | 0.01    | 0.219       |                      |
| DLX5   | cg11997899 | 0.22     | 0.07   | 0.27     | 0.06   | 0.23     | 0.03    | 0.194       |                      |
| VSX1   | cg23097006 | 0.08     | 0.02   | 0.08     | 0.01   | 0.08     | 0.02    | 0.165       |                      |
| DLX2   | cg02014107 | 0.08     | 0.02   | 0.07     | 0.02   | 0.07     | 0.01    | 0.162       |                      |
| HOXA9  | cg07778029 | 0.20     | 0.09   | 0.18     | 0.07   | 0.21     | 0.11    | 0.161       |                      |
| ALX4   | cg07696033 | 0.09     | 0.03   | 0.09     | 0.02   | 0.10     | 0.06    | 0.142       |                      |
| HOXD8  | cg15520279 | 0.03     | 0.00   | 0.02     | 0.00   | 0.03     | 0.01    | 0.138       |                      |
| HOXD13 | cg07175883 | 0.03     | 0.00   | 0.03     | 0.00   | 0.03     | 0.01    | 0.128       |                      |
| HOXA4  | cg04317399 | 0.23     | 0.06   | 0.24     | 0.08   | 0.23     | 0.10    | 0.125       |                      |
| HOXD3  | cg00005847 | 0.22     | 0.04   | 0.22     | 0.05   | 0.22     | 0.07    | 0.116       |                      |
| HOXC6  | cg10593493 | 0.05     | 0.01   | 0.04     | 0.00   | 0.05     | 0.01    | 0.104       |                      |
| HOXB4  | cg04609859 | 0.11     | 0.07   | 0.11     | 0.06   | 0.12     | 0.08    | 0.100       |                      |
| HOXD4  | cg18750960 | 0.23     | 0.07   | 0.20     | 0.10   | 0.22     | 0.14    | 0.091       |                      |
| HOXA13 | cg06397837 | 0.07     | 0.05   | 0.08     | 0.03   | 0.07     | 0.02    | 0.086       |                      |
| HOXD12 | cg23130254 | 0.31     | 0.08   | 0.27     | 0.08   | 0.30     | 0.14    | 0.085       |                      |
| HOXB7  | cg06493080 | 0.10     | 0.05   | 0.09     | 0.02   | 0.09     | 0.02    | 0.079       |                      |
| HOXC5  | cg00187380 | 0.06     | 0.01   | 0.05     | 0.01   | 0.06     | 0.03    | 0.076       |                      |
| MSX1   | cg11930592 | 0.08     | 0.04   | 0.09     | 0.06   | 0.07     | 0.08    | 0.073       |                      |
| HOXD13 | cg19325985 | 0.51     | 0.06   | 0.48     | 0.06   | 0.52     | 0.08    | 0.073       |                      |
| HOXA2  | cg26069745 | 0.25     | 0.07   | 0.17     | 0.11   | 0.24     | 0.12    | 0.068       |                      |
| HOXB4  | cg08089301 | 0.06     | 0.04   | 0.07     | 0.02   | 0.06     | 0.01    | 0.063       |                      |
| HOXB4  | cg25145670 | 0.08     | 0.01   | 0.09     | 0.01   | 0.08     | 0.01    | 0.058       |                      |
| HOXA3  | cg25426743 | 0.56     | 0.06   | 0.58     | 0.07   | 0.57     | 0.11    | 0.052       |                      |
| HOXC8  | cg05022306 | 0.06     | 0.01   | 0.05     | 0.01   | 0.06     | 0.01    | 0.037       |                      |
| HOXD8  | cg21815667 | 0.31     | 0.11   | 0.23     | 0.08   | 0.30     | 0.15    | 0.037       |                      |
| HOXB7  | cg09357097 | 0.11     | 0.05   | 0.11     | 0.07   | 0.11     | 0.05    | 0.026       |                      |
| MSX1   | cg20891301 | 0.73     | 0.03   | 0.77     | 0.04   | 0.73     | 0.05    | 0.017       |                      |
| HOXD1  | cg19001226 | 0.10     | 0.03   | 0.10     | 0.02   | 0.10     | 0.03    | 0.013       |                      |
| HLX1   | cg13170032 | 0.20     | 0.03   | 0.21     | 0.03   | 0.20     | 0.03    | 0.013       |                      |
| MSX1   | cg20588069 | 0.57     | 0.06   | 0.57     | 0.05   | 0.57     | 0.11    | 0.013       |                      |
| HOXB4  | cg06760035 | 0.06     | 0.02   | 0.05     | 0.01   | 0.06     | 0.03    | 0.005       |                      |
